# Supplementary material for: The behavior of a paramagnetic system in electric and magnetic fields as exemplified by revisiting Li@B10H14
Source: Royal Society of Chemistry journal article supplement (doi:10.1039/c7cp00658f), 2017-01-01
Supplement: c7cp00658f1.pdf [file c7cp00658f1.pdf]

## Supplementary Information

### The Behavior of a Paramagnetic System in Electric and Magnetic Fields as Exemplified by Revisiting $\text{Li@B}_{10}\text{H}_{14}$

Miroslav Medved',<sup>a,b</sup> Taye B. Demissie,<sup>c</sup> Michael L. McKee,<sup>d</sup> Drahomír Hnyk\*<sup>e</sup>

<sup>a</sup> Regional Centre of Advanced Technologies and Materials, Department of Physical Chemistry, Faculty of Science, Palacký University in Olomouc, 17. listopadu 1192/12, CZ-771 46 Olomouc, Czech Republic

<sup>b</sup> Department of Chemistry, Faculty of Natural Sciences, Matej Bel University, Tajovského 40, SK - 974 01 Banská Bystrica, Slovak Republic

<sup>c</sup> Centre for Theoretical and Computational Chemistry, UiT The Arctic University of Norway, NO-9037 Tromsø, Norway

<sup>d</sup> Department of Chemistry and Biochemistry, Auburn University, 179 Chemistry Building, Auburn, AL 36849-5312, United States

<sup>e</sup> Institute of Inorganic Chemistry, Academy of Sciences of the Czech Republic, v.v.i., CZ -250 68 Husinec - Řež, Czech Republic. E-mail:

[hnyk@iic.cas.cz](mailto:hnyk@iic.cas.cz)

## **Contents**

1. Dipole moments, polarizability and first hyperpolarizability (all components) of Li@B<sub>10</sub>H<sub>14</sub> (conformer **A**)
2. Dipole moments, polarizability and first hyperpolarizability (all components) of Li@B<sub>10</sub>H<sub>14</sub> (conformer **B**)
3. Cartesian coordinates of Li@B<sub>10</sub>H<sub>14</sub> conformers **A-F**

**Table S1.** Dipole moments, polarizability and first hyperpolarizability of Li@B<sub>10</sub>H<sub>14</sub> (conformer A) evaluated by the MP2 and selected DFT methods using different basis sets. The orientation of the molecule is shown in Figure 1. All values are in a.u.

| Method/basis set                | $\mu_0$ | $\bar{\alpha}$ | $\beta_0$ | $\beta_y$ | $\beta_z$ | $\mu_y$ | $\mu_z$ | $\alpha_{xx}$ | $\alpha_{yy}$ | $\alpha_{zz}$ | $\beta_{yxx}$ | $\beta_{yyy}$ | $\beta_{zxx}$ | $\beta_{zyy}$ | $\beta_{zzy}$ | $\beta_{zzz}$ |
|---------------------------------|---------|----------------|-----------|-----------|-----------|---------|---------|---------------|---------------|---------------|---------------|---------------|---------------|---------------|---------------|---------------|
| MP2/FC/6-31+G(d)                | 2.562   | 140.7          | 1027      | -108      | -1021     | 1.232   | 2.247   | 135.5         | 145.4         | 141.1         | -16           | -79           | -79           | 67            | -85           | -1690         |
| MP2/FC/6-31++G(d,p)             | 2.570   | 140.7          | 970       | -93       | -966      | 1.233   | 2.255   | 136.2         | 145.2         | 140.8         | -18           | -68           | -52           | 45            | -69           | -1603         |
| MP2/FC/6-311+G(d)               | 2.555   | 142.1          | 916       | -73       | -913      | 1.228   | 2.241   | 137.4         | 146.9         | 142.1         | -17           | -63           | -63           | 62            | -41           | -1521         |
| MP2/FC/6-311++G(d,p)            | 2.555   | 142.0          | 863       | -74       | -860      | 1.226   | 2.242   | 137.6         | 147.0         | 141.3         | -19           | -64           | -52           | 57            | -41           | -1437         |
| MP2/FC/6-311++G(2d,p)           | 2.554   | 142.4          | 836       | -75       | -833      | 1.225   | 2.241   | 138.1         | 147.5         | 141.5         | -19           | -63           | -51           | 59            | -42           | -1396         |
| MP2/FC/aug-cc-pVDZ              | 2.548   | 143.9          | 867       | -76       | -864      | 1.223   | 2.235   | 139.4         | 148.8         | 143.4         | -21           | -66           | -56           | 57            | -40           | -1441         |
| MP2/full/aug-cc-pVDZ            | 2.541   | 143.9          | 869       | -75       | -866      | 1.221   | 2.228   | 139.4         | 148.8         | 143.4         | -21           | -66           | -56           | 57            | -39           | -1444         |
| CAM-B3LYP/6-31+G(d)             | 2.524   | 137.3          | 655       | -87       | -649      | 1.225   | 2.207   | 134.0         | 143.5         | 134.5         | -13           | -60           | -57           | 57            | -71           | -1082         |
| CAM-B3LYP/6-31++G(d,p)          | 2.508   | 138.6          | 630       | -82       | -625      | 1.223   | 2.190   | 135.5         | 144.6         | 135.6         | -15           | -56           | -38           | 44            | -65           | -1048         |
| CAM-B3LYP/6-311++G(d,p)         | 2.503   | 139.3          | 560       | -68       | -556      | 1.219   | 2.186   | 136.4         | 145.7         | 135.7         | -15           | -51           | -39           | 50            | -47           | -938          |
| CAM-B3LYP/6-311++G(2d,p)        | 2.499   | 139.5          | 554       | -70       | -550      | 1.219   | 2.182   | 136.6         | 145.9         | 135.8         | -16           | -51           | -39           | 50            | -49           | -928          |
| CAM-B3LYP/<br>6-311++G(3df,3pd) | 2.498   | 139.9          | 540       | -68       | -536      | 1.217   | 2.181   | 137.1         | 146.4         | 136.4         | -17           | -51           | -40           | 47            | -46           | -901          |
| B3LYP/6-31+G(d)                 | 2.499   | 141.7          | 2011      | -255      | -1995     | 1.212   | 2.185   | 135.7         | 145.9         | 143.5         | -20           | -95           | -98           | -4            | -310          | -3223         |
| B3LYP/6-31++G(d,p)              | 2.483   | 142.9          | 1919      | -237      | -1905     | 1.209   | 2.169   | 137.3         | 147.1         | 144.4         | -23           | -91           | -78           | -17           | -281          | -3080         |
| B3LYP/6-311++G(d,p)             | 2.482   | 143.2          | 1645      | -183      | -1635     | 1.207   | 2.169   | 138.1         | 148.0         | 143.5         | -21           | -77           | -74           | 11            | -207          | -2662         |
| B3LYP/6-311++G(2d,p)            | 2.478   | 143.4          | 1621      | -184      | -1611     | 1.207   | 2.165   | 138.3         | 148.2         | 143.6         | -22           | -77           | -73           | 11            | -209          | -2622         |
| BHandHLYP/6-31+G(d)             | 2.558   | 136.0          | 867       | -104      | -861      | 1.233   | 2.241   | 132.4         | 141.6         | 134.1         | -14           | -63           | -65           | 55            | -97           | -1424         |
| BHandHLYP/6-31++G(d,p)          | 2.540   | 137.3          | 835       | -96       | -829      | 1.230   | 2.222   | 134.0         | 142.7         | 135.2         | -16           | -57           | -46           | 42            | -88           | -1379         |
| BHandHLYP/6-311++G(d,p)         | 2.529   | 138.0          | 741       | -77       | -737      | 1.226   | 2.212   | 134.9         | 143.9         | 135.3         | -16           | -52           | -47           | 52            | -60           | -1234         |
| BHandHLYP/6-311++G(2d,p)        | 2.526   | 138.2          | 731       | -79       | -727      | 1.226   | 2.208   | 135.1         | 144.0         | 135.5         | -16           | -53           | -46           | 53            | -62           | -1217         |

**Table S2.** Dipole moments, polarizability and first hyperpolarizability of Li@B<sub>10</sub>H<sub>14</sub> (conformer **B**) evaluated by the MP2 and selected DFT methods using different basis sets. The orientation of the molecule is shown in Figure 1. All values are in a.u.

| Method/basis set            | $\mu_0$ | $\bar{\alpha}$ | $\beta_0$ | $\beta_z$ | $\mu_z$ | $\alpha_{xx}$ | $\alpha_{yy}$ | $\alpha_{zz}$ | $\beta_{zxx}$ | $\beta_{zyy}$ | $\beta_{zzz}$ |
|-----------------------------|---------|----------------|-----------|-----------|---------|---------------|---------------|---------------|---------------|---------------|---------------|
| MP2/FC/6-31+G(d)            | 3.610   | 187.3          | 20704     | -20704    | 3.610   | 147.0         | 154.1         | 260.9         | -2076         | -1666         | -30765        |
| MP2/FC/6-31++G(d,p)         | 3.649   | 180.8          | 14005     | -14005    | 3.649   | 146.5         | 153.7         | 242.3         | -1763         | -1448         | -20131        |
| MP2/FC/6-311+G(d)           | 3.676   | 181.9          | 17331     | -17331    | 3.676   | 147.9         | 155.0         | 242.7         | -1890         | -1475         | -25520        |
| MP2/FC/6-311++G(d,p)        | 3.732   | 174.7          | 10653     | -10653    | 3.732   | 147.1         | 154.3         | 222.8         | -1498         | -1177         | -15080        |
| MP2/FC/6-311++G(2d,p)       | 3.753   | 172.6          | 8578      | -8578     | 3.753   | 146.9         | 154.6         | 216.2         | -1342         | -1083         | -11871        |
| MP2/FC/aug-cc-pVDZ          | 3.722   | 174.9          | 8411      | -8411     | 3.722   | 148.6         | 156.1         | 220.1         | -1389         | -1117         | -11512        |
| MP2/full/aug-cc-pVDZ        | 3.716   | 175.3          | 8727      | -8727     | 3.716   | 148.6         | 156.1         | 221.2         | -1407         | -1126         | -12012        |
| CAM-B3LYP/6-31+G(d)         | 3.869   | 165.6          | 12117     | -12117    | 3.869   | 142.4         | 150.0         | 204.2         | -1155         | -1012         | -18028        |
| CAM-B3LYP/6-31++G(d,p)      | 3.865   | 166.2          | 11718     | -11718    | 3.865   | 143.4         | 151.3         | 203.8         | -1119         | -1024         | -17387        |
| CAM-B3LYP/6-311++G(2d,p)    | 3.913   | 163.9          | 10289     | -10289    | 3.913   | 143.9         | 152.1         | 195.9         | -1002         | -926          | -15221        |
| CAM-B3LYP/6-311++G(3df,3pd) | 3.911   | 164.0          | 10075     | -10075    | 3.911   | 144.2         | 152.4         | 195.4         | -974          | -913          | -14905        |
| B3LYP/6-31+G(d)             | 3.592   | 186.3          | 20258     | -20258    | 3.592   | 147.5         | 154.7         | 256.8         | -2012         | -1636         | -30115        |
| B3LYP/6-31++G(d,p)          | 3.594   | 186.2          | 19606     | -19606    | 3.594   | 148.3         | 156.0         | 254.3         | -1961         | -1651         | -29064        |
| B3LYP/6-311++G(d,p)         | 3.660   | 182.7          | 18877     | -18877    | 3.660   | 148.4         | 156.3         | 243.5         | -1823         | -1543         | -28095        |
| B3LYP/6-311++G(2d,p)        | 3.664   | 182.8          | 18922     | -18922    | 3.664   | 148.4         | 156.4         | 243.6         | -1812         | -1543         | -28182        |
| BHandHLYP/6-31+G(d)         | 3.804   | 169.8          | 15476     | -15476    | 3.804   | 141.5         | 149.1         | 218.9         | -1404         | -1231         | -23158        |
| BHandHLYP/6-31++G(d,p)      | 3.800   | 170.6          | 15132     | -15132    | 3.800   | 142.5         | 150.4         | 218.8         | -1378         | -1255         | -22588        |
| BHandHLYP/6-311++G(d,p)     | 3.848   | 168.3          | 13795     | -13795    | 3.848   | 143.1         | 151.1         | 210.6         | -1283         | -1166         | -20543        |
| BHandHLYP/6-311++G(2d,p)    | 3.851   | 168.3          | 13729     | -13729    | 3.851   | 143.1         | 151.2         | 210.5         | -1269         | -1161         | -20452        |

**Table S3.** Cartesian coordinates of Li@B<sub>10</sub>H<sub>14</sub> conformers A-F (optimized at the UMP2/6-31+G(d) level of theory; given in Å)

**Conformer A**

|    |              |              |              |
|----|--------------|--------------|--------------|
| B  | 2.305493693  | -0.902979850 | -1.387449898 |
| B  | 1.441021978  | -2.386253005 | -0.926687550 |
| B  | 0.569151110  | -0.907316972 | -1.387449898 |
| B  | 1.433628691  | 0.573607713  | -0.948354120 |
| B  | 2.879319018  | -1.837200247 | 0.000000000  |
| B  | 0.000000000  | -1.844392353 | 0.000000000  |
| B  | 0.000000000  | 0.000000000  | 0.000000000  |
| B  | 2.870105046  | 0.007169090  | 0.000000000  |
| H  | 2.973501220  | -0.920372120 | -2.400098548 |
| H  | 1.443403672  | -3.339751021 | -1.677047099 |
| H  | -0.098761196 | -0.928046169 | -2.400098548 |
| H  | 1.431297759  | 1.506783422  | -1.690490063 |
| H  | 3.910826463  | -2.435407891 | -0.024502455 |
| H  | -1.028506128 | -2.447745600 | -0.024502455 |
| H  | -1.039460627 | 0.583857835  | -0.005047321 |
| H  | 3.906635943  | 0.596212440  | -0.005047321 |
| B  | 1.432963374  | 0.839963721  | 0.754150657  |
| B  | 1.441793354  | -2.695069325 | 0.754972811  |
| H  | 1.430214966  | 1.940273596  | 1.206304909  |
| H  | 0.505839353  | 0.092569921  | 1.273167518  |
| H  | 2.363809557  | 0.097210851  | 1.273167518  |
| H  | 2.377162927  | -1.959896664 | 1.274116667  |
| H  | 0.502762775  | -1.964578634 | 1.274116667  |
| H  | 1.444573568  | -3.808112309 | 1.175638903  |
| Li | 1.440120491  | -2.025347789 | -3.151756828 |

## Conformer B

|    |              |              |              |
|----|--------------|--------------|--------------|
| B  | -0.870396000 | 0.000000000  | -1.288229000 |
| B  | 0.000000000  | 1.480102000  | -0.817533000 |
| B  | 0.870396000  | 0.000000000  | -1.288229000 |
| B  | 0.000000000  | -1.480102000 | -0.817533000 |
| B  | -1.443578000 | 0.930853000  | 0.083399000  |
| B  | 1.443578000  | 0.930853000  | 0.083399000  |
| B  | 1.443578000  | -0.930853000 | 0.083399000  |
| B  | -1.443578000 | -0.930853000 | 0.083399000  |
| H  | -1.577526000 | 0.000000000  | -2.248554000 |
| H  | 0.000000000  | 2.446205000  | -1.514118000 |
| H  | 1.577526000  | 0.000000000  | -2.248554000 |
| H  | 0.000000000  | -2.446205000 | -1.514118000 |
| H  | -2.472864000 | 1.531275000  | 0.121830000  |
| H  | 2.472864000  | 1.531275000  | 0.121830000  |
| H  | 2.472864000  | -1.531275000 | 0.121830000  |
| H  | -2.472864000 | -1.531275000 | 0.121830000  |
| B  | 0.000000000  | -1.737422000 | 0.913626000  |
| B  | 0.000000000  | 1.737422000  | 0.913626000  |
| H  | 0.000000000  | -2.836812000 | 1.372468000  |
| H  | 0.977497000  | -1.013301000 | 1.391515000  |
| H  | -0.977497000 | -1.013301000 | 1.391515000  |
| H  | -0.977497000 | 1.013301000  | 1.391515000  |
| H  | 0.977497000  | 1.013301000  | 1.391515000  |
| H  | 0.000000000  | 2.836812000  | 1.372468000  |
| Li | 0.000000000  | 0.000000000  | 2.993465000  |

## Conformer C

|    |              |              |              |
|----|--------------|--------------|--------------|
| B  | -0.872945000 | 1.478089800  | -0.457175460 |
| B  | 0.000000000  | 2.960244787  | 0.000000000  |
| B  | 0.872945000  | 1.478089800  | -0.457175460 |
| B  | 0.000000000  | 0.000000000  | 0.000000000  |
| B  | -1.441197000 | 2.409889651  | 0.911534290  |
| B  | 1.441197000  | 2.409889651  | 0.911534290  |
| B  | 1.426806000  | 0.549276363  | 0.941827490  |
| B  | -1.426806000 | 0.549276363  | 0.941827490  |
| H  | -1.584268000 | 1.489715011  | -1.414880861 |
| H  | 0.000000000  | 3.933426366  | -0.688397272 |
| H  | 1.584268000  | 1.489715011  | -1.414880861 |
| H  | 0.000000000  | -0.947318073 | -0.721935596 |
| H  | -2.468573000 | 3.015882519  | 0.959434669  |
| H  | 2.468573000  | 3.015882519  | 0.959434669  |
| H  | 2.466619000  | -0.034843857 | 0.966556348  |
| H  | -2.466619000 | -0.034843857 | 0.966556348  |
| B  | 0.000000000  | -0.259074271 | 1.713767706  |
| B  | 0.000000000  | 3.181890577  | 1.729990893  |
| H  | 0.000000000  | -1.335797992 | 2.220454570  |
| H  | 0.951364000  | 0.488060216  | 2.216946344  |
| H  | -0.951364000 | 0.488060216  | 2.216946344  |
| H  | -0.961006000 | 2.459001432  | 2.224784668  |
| H  | 0.961006000  | 2.459001432  | 2.224784668  |
| H  | 0.000000000  | 4.330080671  | 2.121147634  |
| Li | 0.000000000  | 3.616247654  | 3.948271217  |

## Conformer D

|    |              |              |              |
|----|--------------|--------------|--------------|
| B  | 0.873232595  | 1.464843299  | -0.485841573 |
| B  | 0.000000000  | 0.000000000  | 0.000000000  |
| B  | -0.870612212 | 1.452386363  | -0.477296778 |
| B  | 0.000000000  | 2.922328566  | 0.000000000  |
| B  | 1.422645196  | 0.556959232  | 0.941914684  |
| B  | -1.445606654 | 0.504767335  | 0.916927176  |
| B  | -1.426059667 | 2.337460517  | 0.952917900  |
| B  | 1.438240917  | 2.366889091  | 0.940328061  |
| H  | 1.567720949  | 1.434746329  | -1.456837963 |
| H  | 0.014876322  | -0.965908939 | -0.735708531 |
| H  | -1.564233818 | 1.428028431  | -1.447346878 |
| H  | -0.009152268 | 3.876143867  | -0.713488670 |
| H  | 2.461703106  | -0.070830090 | 0.957495942  |
| H  | -2.462047686 | -0.118332519 | 0.894971909  |
| H  | -2.462435203 | 2.927034796  | 0.970696964  |
| H  | 2.476525829  | 2.954566073  | 0.936928503  |
| B  | 0.000000000  | 3.180005827  | 1.710179891  |
| B  | -0.000196909 | -0.305490515 | 1.707282076  |
| H  | -0.016643705 | 4.276127164  | 2.172496410  |
| H  | -0.918699584 | 2.419066424  | 2.226126255  |
| H  | 0.954413593  | 2.472132505  | 2.227002370  |
| H  | 0.916746127  | 0.427216867  | 2.241863905  |
| H  | -0.961887196 | 0.348284907  | 2.235284810  |
| H  | 0.075144377  | -1.450705986 | 2.085374141  |
| Li | 1.383085244  | -1.671625296 | 0.380560969  |



## Conformer E

|    |              |              |              |
|----|--------------|--------------|--------------|
| B  | -0.876496354 | 1.483670000  | -0.461644542 |
| B  | 0.000000000  | 0.000000000  | 0.000000000  |
| B  | 0.848919710  | 1.483670000  | -0.464392497 |
| B  | 0.000000000  | 2.967340000  | 0.000000000  |
| B  | -1.422153254 | 0.558924000  | 0.945791778  |
| B  | 1.399185735  | 0.574665000  | 0.965518485  |
| B  | 1.399185735  | 2.392675000  | 0.965518485  |
| B  | -1.422153253 | 2.408416000  | 0.945791778  |
| H  | -1.570282804 | 1.483670000  | -1.431766580 |
| H  | 0.030279908  | -0.945997000 | -0.724626714 |
| H  | 1.553275735  | 1.483670000  | -1.452549246 |
| H  | 0.030279908  | 3.913337000  | -0.724626714 |
| H  | -2.456183936 | -0.033829000 | 0.957443729  |
| H  | 2.454078544  | -0.027698000 | 0.925918409  |
| H  | 2.454078545  | 2.995038000  | 0.925918409  |
| H  | -2.456183936 | 3.001169000  | 0.957443729  |
| B  | 0.000000000  | 3.255778000  | 1.709371032  |
| B  | 0.000000000  | -0.288438000 | 1.709371032  |
| H  | 0.009764437  | 4.366676000  | 2.135135216  |
| H  | 0.941187050  | 2.533845000  | 2.255911530  |
| H  | -0.919084482 | 2.508223000  | 2.229828293  |
| H  | -0.919084482 | 0.459117000  | 2.229828293  |
| H  | 0.941187050  | 0.433495000  | 2.255911530  |
| H  | 0.009764437  | -1.399336000 | 2.135135216  |
| Li | 3.118163951  | 1.483670000  | -0.153734650 |

## Conformer F

|    |              |              |              |
|----|--------------|--------------|--------------|
| B  | -0.873285053 | 1.479082391  | -0.479397746 |
| B  | 0.000000000  | 0.000000000  | 0.000000000  |
| B  | 0.860857264  | 1.461081228  | -0.453415804 |
| B  | 0.000000000  | 2.944634283  | 0.000000000  |
| B  | -1.434552899 | 0.582520398  | 0.932275527  |
| B  | 1.427183409  | 0.571347319  | 0.966483104  |
| B  | 1.419118176  | 2.384571181  | 0.956996685  |
| B  | -1.433857276 | 2.426109072  | 0.917363781  |
| H  | -1.548003992 | 1.497475460  | -1.463542008 |
| H  | 0.010365383  | -0.948132289 | -0.721311195 |
| H  | 1.562391427  | 1.471659257  | -1.445915913 |
| H  | 0.037746650  | 3.899936115  | -0.746933220 |
| H  | -2.473170499 | -0.002717267 | 0.935664463  |
| H  | 2.466558364  | -0.015557204 | 0.968770131  |
| H  | 2.469290340  | 2.988735394  | 0.905388842  |
| H  | -2.455454712 | 3.039725563  | 0.900496900  |
| B  | 0.000000000  | 3.275873586  | 1.693819015  |
| B  | -0.011918576 | -0.254609823 | 1.709648131  |
| H  | 0.011589568  | 4.404394350  | 2.074225566  |
| H  | 0.939989778  | 2.567057419  | 2.241242471  |
| H  | -0.933782074 | 2.555231539  | 2.211779060  |
| H  | -0.946761977 | 0.497990528  | 2.208690406  |
| H  | 0.916758408  | 0.474897728  | 2.243284825  |
| H  | -0.025336025 | -1.351682640 | 2.169447857  |
| Li | 1.920064867  | 3.372209786  | -1.059291458 |
